# Supplementary material for: 4-Methylumbeliferone Treatment at a Dose of 1.2 g/kg/Day Is Safe for Long-Term Usage in Rats
Source: MDPI journal article supplement (doi:10.3390/ijms24043799), 2023-02-14
Supplement: s1 [file s1]

**Supplementary Table S1** An overview of 4MU doses, 4MU administration time and experimentally treated diseases

| Species | Conditions                                | Treatment duration | Dose [g/kg/day]         | PubMed ID                                                                                         | Year |
|---------|-------------------------------------------|--------------------|-------------------------|---------------------------------------------------------------------------------------------------|------|
| Mouse   | Osteoarthritis                            | 8 wks              | 6 - 10                  | 31774188                                                                                          | 2020 |
|         | Autoimmune type 1 diabetes                | 1 wk               | 10                      | 26368307                                                                                          | 2015 |
|         | Type 2 diabetes                           | 5 wks              | 8                       | 34376643                                                                                          | 2021 |
|         | Obesity and diabetes                      | 22 wks             | 12                      | 31602424                                                                                          | 2019 |
|         | Myocardial hypertrophy and fibrosis       | 8 wks              | 10                      | 33745300                                                                                          | 2021 |
|         | Liver fibrosis                            | 16 or 30 days      | 0.6                     | 31847129                                                                                          | 2019 |
|         | Pulmonary hypertension                    | 2 wks              | 0.02                    | 28688167                                                                                          | 2017 |
|         | Non-alcoholic steatohepatitis             | 2 wks              | 0.2                     | 33486695                                                                                          | 2021 |
|         | Memory enhancement                        | 6 months           | 6.7                     | 35066096                                                                                          | 2022 |
|         | Experimental autoimmune encephalomyelitis | 5 days             | 6.7                     | 24973214                                                                                          | 2014 |
|         | Experimental autoimmune encephalomyelitis | 2 wks              | 6 - 10                  | 27218304                                                                                          | 2016 |
|         | Renal ischaemia–reperfusion injury        | 2 or 30 days       | 10                      | 24078641                                                                                          | 2013 |
|         | Vascular injury                           | 24 days            | 6                       | 23484050                                                                                          | 2013 |
|         | Chronic prostatitis                       | 6 wks              | 0.5                     | 34320251                                                                                          | 2021 |
|         | Lung cancer                               | 15 days            | 0.4 (orally), 0.02 (IP) | 35202638                                                                                          | 2022 |
|         | Malignant peripheral nerve sheath tumor   | 6 wks              | 0.4 - 0.5               | 27706810                                                                                          | 2017 |
|         | Orthotopic hepatocellular carcinoma       | 2 wks              | 1                       | 22038477                                                                                          | 2012 |
|         | Leukemia                                  | 10 days            | 0.15, 0.3, 0.45         | 23876826                                                                                          | 2013 |
|         | Hepatocellular carcinoma                  | 12 months          | 0.013 - 6.7             | 29475909                                                                                          | 2018 |
|         | Hepatocellular carcinoma                  | 12 wks             | 0.025 - 0.5             | 30858465                                                                                          | 2019 |
|         | Hepatocellular carcinoma                  | 20 days            | 0.4                     | 25882295                                                                                          | 2015 |
|         | Hepatocellular carcinoma                  | 1 days             | 0.2                     | 33737571                                                                                          | 2021 |
|         | Metastatic breast cancer stem–like cells  | 45 days            | 0.4                     | 22113945                                                                                          | 2012 |
|         | Metastatic lesions of bone                | 14 days            | 0.0125                  | 21387290                                                                                          | 2012 |
|         | Bladder cancer                            | 35 days            | 0.2 - 0.4               | 28972965                                                                                          | 2017 |
|         | Pancreatic tumor                          | 4 wks              | 2                       | 27846148                                                                                          | 2017 |
|         | Prostate cancer                           | 28 wks             | 0.45                    | 25868577                                                                                          | 2015 |
|         | Pancreatic cancer                         | x                  | 2                       | 27698797                                                                                          | 2016 |
|         | Acute Lung Injury                         | 2 days             | 0.45                    | 24141285                                                                                          | 2013 |
| Rat     | Nerve injury                              | 3 hrs or 7 days    | 0.4                     | 18725268                                                                                          | 2008 |
|         | Spinal cord injury                        | 8 wks              | 2.0                     | <a href="https://doi.org/10.1101/2023.01.23.525137">https://doi.org/10.1101/2023.01.23.525137</a> | 2023 |
|         | Ischemia/reperfusion injury               | 1 day              | 0.025                   | 32661417                                                                                          | 2020 |
| Human   | Covid-19                                  | X                  | 1.2                     | 35304437                                                                                          | 2022 |
